# Supplementary material
Source: publisher figshare collection journal article supplement (https://gsajournals.figshare.com/ndownloader/files/23268716)
Supplement: Supplementary file 1 [file 23268716]

## Sheet: nNIL 415 ANOVA stepwise agpv2
Table S5. Analysis of variance, marker estimate and confidence interval for stepwise regression of northern leaf blight (audpc) in the nested NIL library.
Trait	Name	Locus	Position	df	SS	MS	F	pr>F	BIC	mBIC	AIC	Model Rsq	Estimate	CI scan: SuppLeft	CI scan: SuppRight
audpc	mean	--	--	1	231536	231536	9977.52	2.1566e-289	1335.05	3981.29	1310.88	0.38128	--	--	--
audpc	S1_191522802	1	191522802	1	1577.08	1577.08	67.9607	2.2936e-15	1335.05	3981.29	1310.88	0.38128	-9.8623	S1_191514879	S1_191522898
audpc	S8_138561937	8	138561937	1	1320.86	1320.86	56.9194	2.9711e-13	1335.05	3981.29	1310.88	0.38128	-8.0028	S8_138557765	S8_138561999
audpc	S5_193652476	5	193652476	1	1150.49	1150.49	49.5777	8.1102e-12	1335.05	3981.29	1310.88	0.38128	11.4504	S5_193652068	S5_193652533
audpc	S6_141836653	6	141836653	1	1068.27	1068.27	46.0349	4.0892e-11	1335.05	3981.29	1310.88	0.38128	-9.705	S6_141836489	S6_141836737
audpc	S2_4263855	2	4263855	1	597.574	597.574	25.7511	5.9062e-07	1335.05	3981.29	1310.88	0.38128	14.1738	S2_4263716	S2_4263951
audpc	Error	--	--	409	9491.15	23.2057	NaN	NaN
